# Functional Connectome Fingerprinting Using Shallow Feedforward Neural Networks

Gokce Sarar<sup>a,b</sup>, Bhaskar Rao<sup>b</sup>, and Thomas Liu<sup>a,c,1</sup>

<sup>a</sup>Center for Functional MRI, University of California San Diego; <sup>b</sup>Department of Electrical Engineering, University of California San Diego; <sup>c</sup>Departments of Radiology and Psychiatry, University of California San Diego

This manuscript was compiled on October 19, 2020

1 **Although individual subjects can be identified with high accuracy**  
2 **using correlation matrices computed from resting-state functional**  
3 **magnetic resonance imaging (rsfMRI) data, the performance signifi-**  
4 **cantly degrades as the scan duration is decreased. Recurrent neural**  
5 **networks can achieve high accuracy with short duration (72s) data**  
6 **segments but are designed to use temporal features not present in**  
7 **the correlation matrices. Here we show that shallow feedforward**  
8 **neural networks that rely solely on the information in rsfMRI corre-**  
9 **lation matrices can achieve state-of-the-art identification accuracies**  
10 **( $\geq 99.5\%$ ) with data segments as short as 20s and across a range of**  
11 **input data-size combinations when the total number of data points (#**  
12 **regions  $\times$  # time points) is on the order of 10,000.**

fMRI | Connectome | Neural Network | Fingerprinting

1 Functional connectome fingerprinting based on the similar-  
2 ity of correlation coefficient matrices computed from rsfMRI  
3 data can identify individuals with high accuracy ( $> 98\%$ )  
4 using long duration ( $> 12$  minute) scans but considerably  
5 lower accuracy ( $\approx 68\%$ ) is obtained when the data duration is  
6 decreased to 72s (1). Recurrent neural networks (RNN) can  
7 achieve high accuracy (98.5%) with short duration (72s) data,  
8 presumably reflecting their ability to capture both spatial  
9 and temporal features (2, 3). However, it has been shown  
10 that high RNN performance can be achieved even when the  
11 temporal order of the fMRI data is permuted (4), suggesting  
12 that the temporal features are not critical for identification.  
13 Here we introduce two shallow feedforward neural networks  
14 that can achieve high identification accuracy without the need  
15 for recurrent connections. Furthermore, we use these networks  
16 to estimate the minimum size of the data needed to robustly  
17 identify subjects with high mean accuracy ( $\geq 99.5\%$ ) from  
18 short segments of rsfMRI data.

19 The two networks considered are shown in Figure 1A and  
20 1B. The input to the correlation neural network (corrNN)  
21 consists of the upper triangular elements of the correlation  
22 coefficient matrix  $C$  estimated from a data matrix  $X$  consisting  
23 of z-normalized time series (of length  $N$ ) from  $M$  regions of  
24 interest (ROI). For identification of  $L$  subjects, the network  
25 structure consists of a fully connected classification layer with  
26  $L$  units, a batch normalization layer, and a softmax layer. The  
27 norm-based neural network (normNN) uses the z-normalized  
28 data  $X$  as the input. The first stage is a fully connected  
29 layer that projects the data onto  $K$  hidden units using the  
30  $M \times K$  weight matrix  $W$  to form the  $N \times K$  intermediate  
31 matrix  $Y = XW$ . In the second stage, the  $L_2$  norm across the  
32 time-dimension (i.e. across each column of  $Y$ ) is computed  
33 for each hidden unit to form a summary measure of similarity  
34 over the collection of  $N$  time points. The resulting vector  
35  $F = \sqrt{\text{diag}(Y^T Y)} = \sqrt{\text{diag}(W^T C W)}$  is comprised of  $K$

features extracted from the correlation matrix  $C$ . The  $k$ th  
feature is proportional to the variance in the direction of the  
 $k$ th column vector of  $W$ . If these vectors are randomly oriented  
and constrained to be unit norm, then the features represent a  
random sampling of the "peanut" shaped surface of directional  
variances (5). The subsequent stages in the network are: a  
batch normalization layer, a fully connected classification layer  
with  $L$  hidden units, a second batch normalization layer, and  
a softmax layer.

## Results

We assessed the performance of the two networks using data  
from the Human Connectome Project (HCP) (6). Two rsfMRI  
scans acquired on Day 1 were used for training, while the two  
scans from Day 2 were used for validation and testing.

For  $M = 379$  ROIs,  $N = 100$  time points (72s duration) per  
segment, and  $K = 256$  hidden units, the mean classification  
accuracies of the corrNN and normNN models were 99.9%  
and 99.2%, respectively, for an initial set of 100 subjects, and  
99.8% and 99.5% for a second independent set of 100 subjects.  
These accuracies are higher than those reported (94.3% to  
98.5%) for RNN models (2, 3). For comparison, the mean  
classification accuracy using the similarity of the correlation  
coefficients was 79.4% for 100 time points per segment, which  
is higher than the 68% mean accuracy reported in (1) using  
data from a different dataset.

We used a greedy search algorithm to assess the relative  
importance of the ROIs with respect to model accuracy. Im-  
portance maps are shown in the top rows of Figures 1C and 1D,  
respectively, with the subsequent rows thresholded to highlight  
the top 15 to 60 ROIs. When considering the top 60 ROIs,  
the highest number of ROIs for both models are found in  
the dorsolateral prefrontal cortex followed by inferior parietal  
cortex, lateral temporal cortex, superior parietal cortex (for  
CorrNN), inferior frontal Cortex, and dorsal stream visual  
cortex, where brain regions are as defined in (7).

We used the top ROIs to evaluate CorrNN and NormNN  
performance with 15 to 60 ROIs and 5 to 1000 time points, as  
shown in Figures 1E and 1F, respectively. As the number of  
ROIs decreases, the number of time points needed to achieve  
higher accuracy increases. Defining 99.5% as the threshold for  
high mean accuracy, we observed that this threshold is sur-  
passed with as few as  $M = 60$  ROIs and  $N = 100$  time points  
for CorrNN and 40 ROIs and 200 time points for NormNN,

G.S., B.R., and T.L. designed the research. G.S. and T.L. performed the research and wrote the paper.

The authors declare no competing interest.

<sup>1</sup>To whom correspondence should be addressed. E-mail: tliu@ucsd.edu

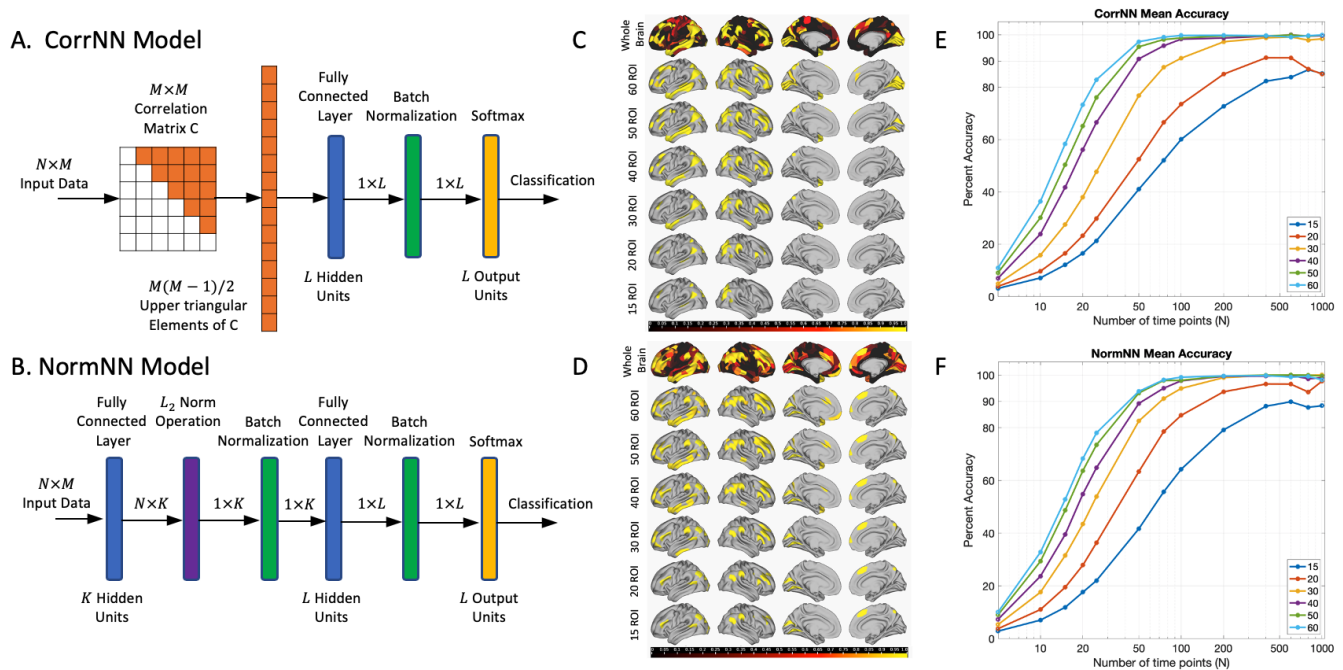

**Fig. 1.** (A,B) CorrNN and NormNN model structures. (C,D) Top rows: Maps showing the relative importance of the ROIs for identification accuracy with maximum importance of 1.0 indicated in yellow. The remaining rows are thresholded to show the locations of the top 15 to 60 ROIs. (E,F) Mean identification accuracies as a function of the number of time points and ROIs.

79 corresponding to  $M \times N = 6000$  or  $8000$  total data points,  
80 respectively.

81 To further explore the dependence on number of ROIs and  
82 time points, we considered combinations  $(M, N)$  where the  
83 total number of data points was constrained to be equal to  
84 or close to either 6000 or 10,000 (see Figure 2 caption). For  
85 CorrNN, high mean accuracies are obtained for two of the  
86 combinations (dark red squares) with 6000 data points and  
87 all five of the combinations (dark red diamonds) with 10,000  
88 points, respectively.

89 For NormNN, the number of parameters exhibits a linear  
90 dependence on the number of ROIs  $(M)$  as compared to the  
91 quadratic dependence for CorrNN (see Figure 2 caption). To  
92 better compare the models, we increased  $K$  by powers of 2 up  
93 to the value  $K_{eq} = 0.5L(M^2 - M)/(M + L + 3)$  for which the  
94 numbers of NormNN and CorrNN parameters were equivalent,  
95 while also including  $K_{eq}$  as one of the possible options. In figure  
96 2b, we show NormNN accuracies obtained for either (1) the  
97 minimum value of  $K \geq 256$  that surpassed the 99.5% threshold  
98 or (2) the value  $K \leq K_{eq}$  that achieved the highest accuracy  
99 when the threshold was not met. High mean accuracies were  
100 obtained for three and four of the combinations with 6000 and  
101 10,000 data points, respectively. As shown by the histograms,  
102 the high mean CorrNN and NormNN accuracies correspond  
103 to robust identification performance with the majority of the  
104 trials demonstrating 100 percent prediction accuracy.

105 Using the ROIs determined from the first 100 subjects we  
106 evaluated performance on the 2nd set of 100 subjects for the  
107 combinations denoted in Figure 2. High mean CorrNN accuracies  
108 ( $\geq 99.5\%$ ) were maintained for both of the previously  
109 identified high performance combinations with 6000 points and  
110 three of the combinations with 10,000 points, with the remain-  
111 ing two combinations (with  $M \geq 300$ ) exhibiting slightly lower

112 accuracies ( $\geq 99.33\%$ ) for the 2nd dataset. Thus, the same set  
113 of ROIs can offer comparable and high levels of performance  
114 across independent datasets.

115 For NormNN we find that the first layer trained weights are  
116 randomly distributed so that the features after the  $L_2$  norm  
117 operation represent an approximately uniform sampling of the  
118 directional variance surface of  $C$ . Indeed, high performance  
119 can also be achieved by replacing the first layer with a set of  
120 random Gaussian weights. The generalizability of the features  
121 across datasets exhibits a dependence on the number of units  
122  $K$ . For example, when using first layer weights trained using  
123 the first set of subjects, performance for the combination  
124 (50, 200) with  $K = 256$  drops from 99.66% for the first 100  
125 subjects to 97.98% for the second 100 subjects. Increasing  
126 to 512 units with weights trained using the first set yields  
127 accuracies of 99.64% and 99.52% for the first and second sets,  
128 respectively. Essentially the same accuracy levels (99.59% and  
129 99.56%) are obtained when using random weights for the first  
130 layer. Thus, generalizability of the NormNN features increases  
131 when there is a higher number of features to characterize the  
132 directional variance.

## 133 Discussion

134 We have shown that shallow feedforward models can identify  
135 subjects based solely on information in rsfMRI correlation ma-  
136 trices, with CorrNN directly using the correlation coefficients  
137 as features while NormNN uses features related to the direc-  
138 tional variance surface. The performance levels achieved are  
139 state-of-the-art, with high ( $\geq 99.5\%$ ) mean identification accu-  
140 racies robustly obtained with 6000 to 10,000 data points. For  
141 comparison, the convolutional RNN presented in (3) achieved  
142 98.5% accuracy with 23,600 data points.

143 Consistent with prior observations (1), high performance

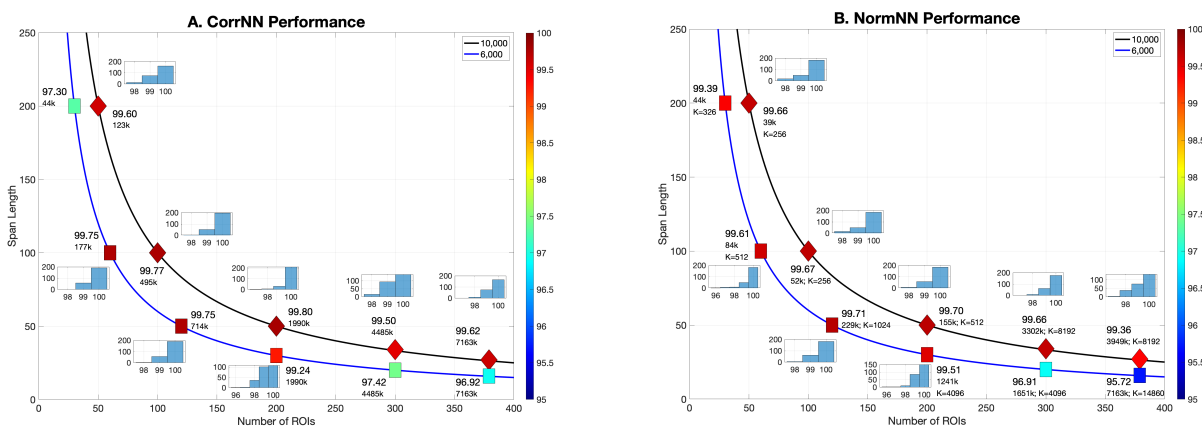

**Fig. 2.** (A,B) CorrNN and NormNN identification accuracies for combinations  $(M, N)$  of numbers of ROIs  $(M)$  and span lengths  $(N)$  that are constrained to have either 6000 or 10,000 data points, with the exception of the combinations  $(379, 16)$ ,  $(300, 34)$ , and  $(379, 27)$ , which have 6064, 10,200, and 10,233 data points, respectively. Mean accuracies are indicated by labels and color scale. The numbers of model parameters (in thousands) for CorrNN  $(0.5L(M^2 - M + 6))$  and NormNN  $(K(M + L + 3) + 3L)$  are also listed (with  $L = 100$ ), as are the numbers of hidden units  $(K)$  for NormNN combinations. For combinations where CorrNN mean accuracy is greater than 99%, auto-scaled histograms show the distribution of identification accuracies obtained over 250 test trials per combination.

144 can be achieved when using a subset of the ROIs, including  
 145 those located in frontoparietal and lateral temporal regions.  
 146 The same set of ROIs can be used to achieve high performance  
 147 across independent datasets, suggesting that the predictive  
 148 value of inter-subject variability in the functional boundaries  
 149 and connectivity of these regions generalizes across datasets.

150 While combinations with span lengths as short as 27 points  
 151 (19.5s; CorrNN  $(379, 27)$ ) can offer high performance, they  
 152 require a large number of model parameters. In contrast,  
 153 combinations with fewer ROIs but increased span lengths (e.g.  
 154  $(100, 100)$ ) achieve high performance with one to two orders  
 155 of magnitude fewer parameters. For NormNN the number of  
 156 trainable parameters can be further decreased through the use  
 157 of random weights in the first layer.

158 The effectiveness of the feedforward networks for distin-  
 159 guishing individuals with relatively little data suggests that  
 160 similar future approaches may have the potential to more fully  
 161 utilize the information contained in rsfMRI data to better  
 162 identify disease-related differences.

## 163 Materials and Methods

164 **Data and Preprocessing.** We used pre-processed rsfMRI data from  
 165 the 100 Unrelated Subjects subset of the HCP1200 Data Release  
 166 and an additional 100 subjects from the S900 subset. HCP pre-  
 167 processing included detrending, denoising, and registration to a  
 168 common cortical surface. We divided the data into 379 regions of  
 169 interest (ROI) consisting of 360 ROIs in the cortex as defined in (7)  
 170 and 19 subcortical ROIs as defined in the group average parcellation  
 171 provided by the HCP (6). The time series were averaged within  
 172 each ROI and global signal regression was applied to the ROI time  
 173 series.  
 174

175 **Training, Validation, and Testing.** We used the ROI-averaged data  
 176 from day one as the training set (2 scans; 1200 pts per scan)  
 177 and data from day two as validation and test sets (1 scan each).  
 178 The performance was initially assessed using  $K = 379$  ROIs and  
 179  $N = 100$  time points. Overlapping data segments were used with  
 180 shifts of 1 point between segments for training and 25 points for both  
 181 validation and testing. The full connected layers were initialized  
 182 with the Glorot uniform initializer We used the Adam optimizer with  
 183 learning rate,  $\beta_1$ , and  $\beta_2$  values of 0.001, 0.9, and 0.999, respectively.  
 184 We used a batch size of 64 and monitored the validation loss every

600 steps with patience set to 30 monitoring steps, with learning  
 rate annealed by halving it every 100 monitoring points.

186 Using the trained model weights, we assessed the relative impor-  
 187 tance of the ROIs by first looping over all 379 ROIs, independently  
 188 zeroing out the data from each ROI, and finding the ROI for which  
 189 the model retained its maximum accuracy. The identified ROI data  
 190 was eliminated (i.e. set to zero) for the remainder of the process  
 191 and the search was repeated over the remaining 378 ROIs to select  
 192 the next ROI for elimination. This process was continued until only  
 193 one ROI remained. The importance score of each ROI was  $1 - M_c$   
 194 where  $M_c$  denotes the model accuracy just prior to ROI elimination.  
 195

196 We then examined performance across a range of ROI numbers  
 197 ( $K = 15$  to 60; with the top  $K$  ROIs selected based on importance  
 198 scores) and durations ( $N = 5$  to 1000 time points), retraining the  
 199 models for each combination  $(K, N)$  with 1 point shifts for both  
 200 training and validation. Testing was performed with 250 randomly  
 201 chosen initial starting points with the exception of 200 sequential  
 202 points for  $N = 1000$ . Performance using additional parameter  
 203 combinations was also evaluated.

204 We used the approach of (1) to identify subjects based on simi-  
 205 larity of the correlation coefficient matrices. Target matrices were  
 206 calculated using all the data from day one, whereas test matrices  
 207 were calculated using data segments from day two. Identification  
 208 was performed by computing the spatial correlation between the  
 209 test and target matrices and then matching (with replacement) each  
 210 test matrix to the most highly correlated target matrix.

211 **ACKNOWLEDGMENTS.** We thank Eric Wong, Garrison Cot-  
 212 trell, Jiawei Ren, and Shili Wang for their assistance and helpful  
 213 comments.

- 214 1. Finn ES, et al. (2015) Functional connectome fingerprinting: Identifying individuals using pat-  
 215 terns of brain connectivity. *Nature Neuroscience* 18(11):1664–1671.
- 216 2. Chen S, Hu X (2018) Individual Identification Using the Functional Brain Fingerprint Detected by  
 217 the Recurrent Neural Network. *Brain Connectivity* 8(4):197–204.
- 218 3. Wang L, Li K, Chen X, Hu XP (2019) Application of Convolutional Recurrent Neural Network  
 219 for Individual Recognition Based on Resting State fMRI Data. *Frontiers in Neuroscience*  
 220 13(May):1–8.
- 221 4. Sarar G, Wang S, Ren J, Liu TT (2019) Functional Connectome Fingerprinting using Recurrent  
 222 Neural Networks Does Not Depend on the Temporal Structure of the Data in *Proceedings of the*  
 223 *27th Annual Meeting of the ISMRM*.
- 224 5. Bartz D, Hatrick K, Hesse CW, Müller KR, Lemm S (2013) Directional Variance Adjustment:  
 225 Bias Reduction in Covariance Matrices Based on Factor Analysis with an Application to Port-  
 226 folio Optimization. *PLoS ONE* 8(7):e67503.
- 227 6. Van Essen DC, et al. (2013) The WU-Minn Human Connectome Project: An overview. *Neu-  
 228 roImage* 80:62–79.
- 229 7. Glasser MF, et al. (2016) A multi-modal parcellation of human cerebral cortex. *Nature*  
 230 536(7615):171–178.
